# Supplementary material for: Porphyrins produced by acneic Cutibacterium acnes strains activate the inflammasome by inducing K+ leakage
Source: PubMed Central journal article supplement (PMC8188554; doi:10.1016/j.isci.2021.102575), 2021-05-21

iScience, Volume 24

## Supplemental information

**Porphyrins produced by acneic**

***Cutibacterium acnes* strains activate**

**the inflammasome by inducing K<sup>+</sup> leakage**

**Karl-Jan Spittaels, Katleen van Uytfanghe, Christos C. Zouboulis, Christophe Stove, Aurélie Crabbé, and Tom Coenye**

**Figure S1. Related to Figure 4.** K<sup>+</sup> efflux as determined by quantification of PBFI-AM fluorescence after 30 min stimulation of HaCaT monolayer cells with 1 μM CPI, CPIII, PPIX or the extracted porphyrins. Error bars represent standard error of the mean. \*\* p<0.01, \*\*\* p<0.05.

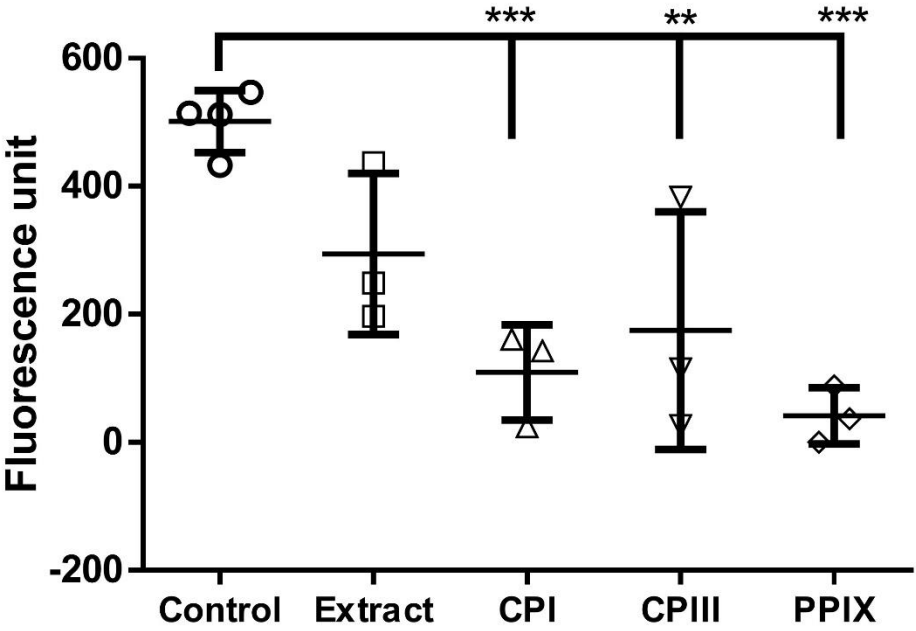

**Figure S2. Related to Figure 4.** Cell viability after 30 min exposure to extracted porphyrins at 2.5  $\mu\text{M}$ , 1.0  $\mu\text{M}$ , and 0.5  $\mu\text{M}$ , measured by determination of LDH release and expressed as the % of dead cells compared to 100% lysed cells using 1 %Triton X-100. Data presented are mean  $\pm$  SEM.

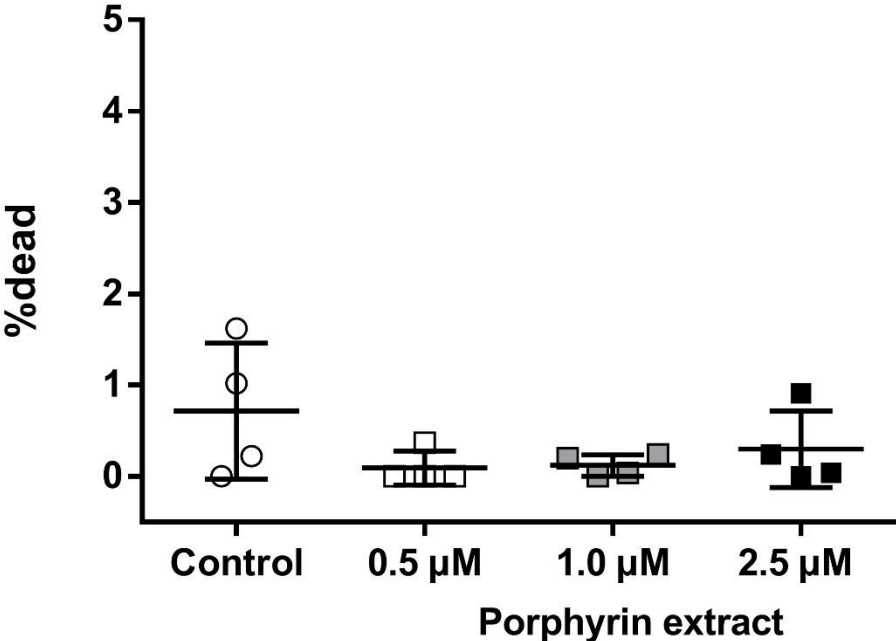

**Figure S3. Schematic overview of the keratinocyte-sebocyte co-culture model. Related to STAR Methods.** Sebocytes are cultured on bottom of a 24 well MTP while keratinocytes are cultured in well inserts separately for 5 days. Both cultures are combined for 2 days after which *C. acnes* is added in the inserts.

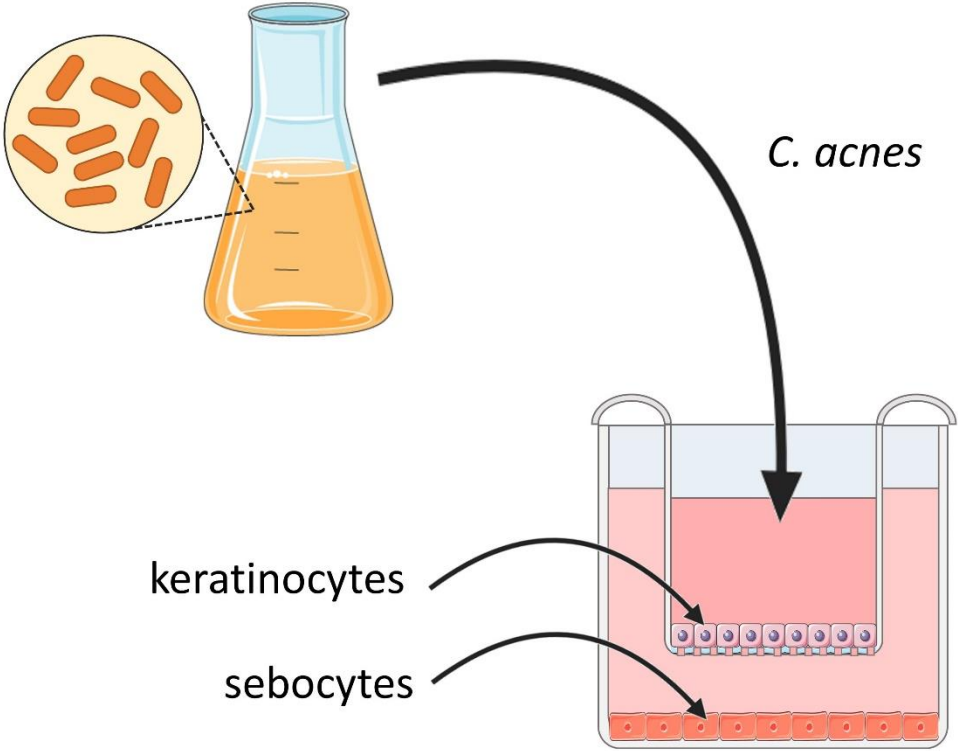

**Figure S4. Related to STAR Methods.** Optical densities (OD, 590 nm) of 48h old planktonic *C. acnes* cultures grown in Reinforced Clostridial Medium. Top: data for individual strains. Bottom: average per phylotype (error bar: standard deviation).

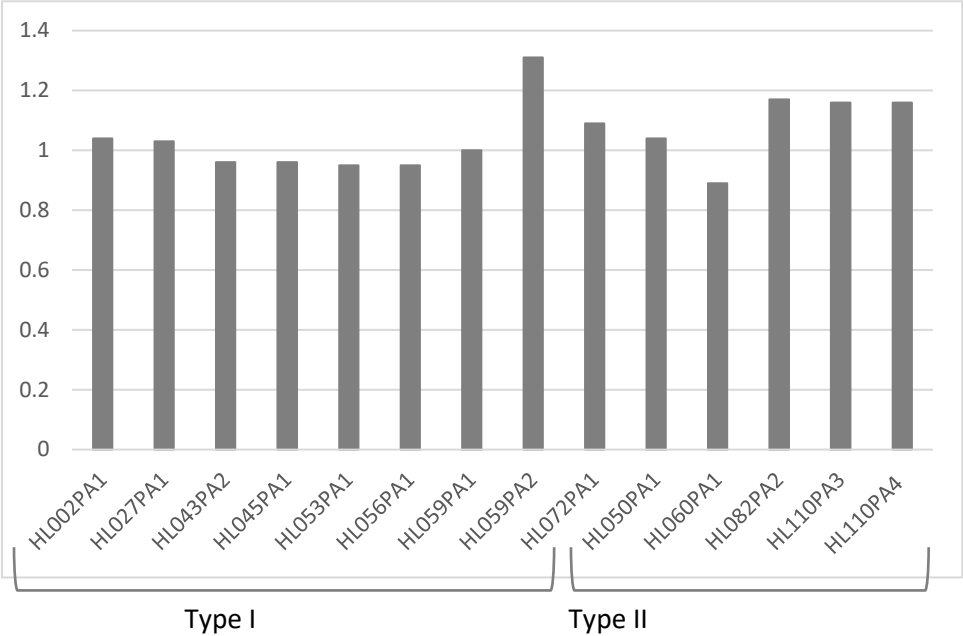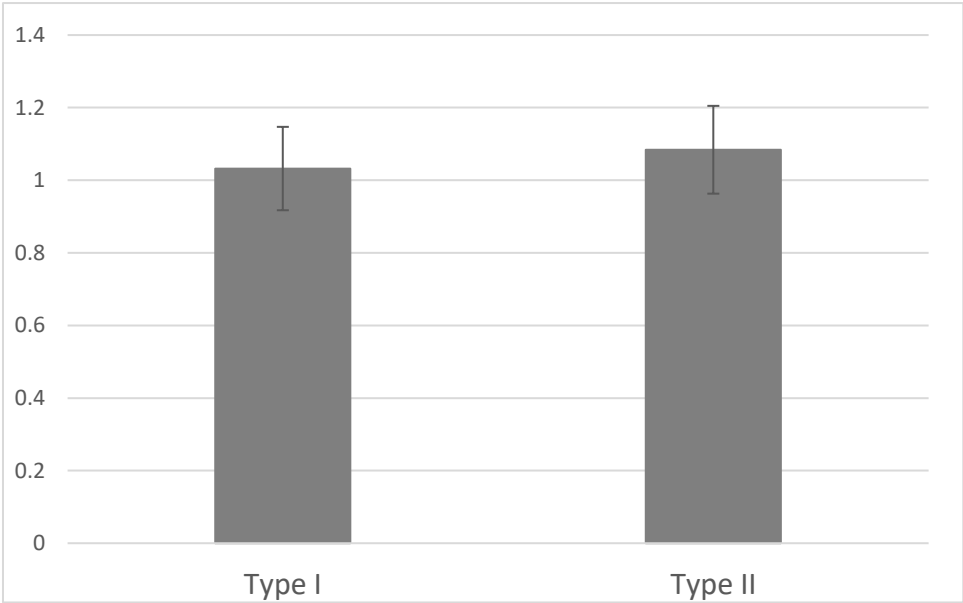

Supplement: mmc1.pdf [file mmc1.pdf]
